# Supplementary material for: The fabrication of palladium–pyridyl complex multilayers and their application as a catalyst for the Heck reaction
Source: Royal Society of Chemistry journal article supplement (doi:10.1039/c1jm11759a), 2011-01-01

# **The fabrication of palladium-pyridyl complex multilayers and their application as a catalyst for the Heck reaction**

Shuiying Gao, Yuanbiao Huang, Minna Cao, Tian-fu Liu and Rong Cao\*

## Supporting Information List of Contents

|                          |    |
|--------------------------|----|
| (A) Analytical Data..... | S2 |
| (C) References.....      | S3 |
| (D) Spectra.....         | S4 |

Analytical data for the products of the Heck reaction:

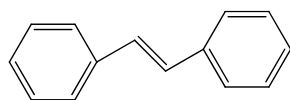

*trans*-stilbene:  $^1\text{H}$  NMR (400MHz,  $\text{CDCl}_3$ ):  $\delta$ 7.11 (s, 2H), 7.24-7.28 (m, 2H), 7.36 (t,  $J=7.6\text{Hz}$ , 4H), 7.49-7.55 (m, 4H);  $^{13}\text{C}$  NMR (100MHz,  $\text{CDCl}_3$ ):  $\delta$ 126.51, 127.62, 128.68, 128.69, 137.33.

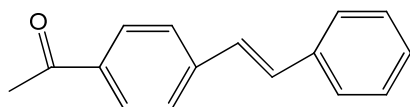

4-acetyl-*trans*-stilbene:  $^1\text{H}$  NMR (400 MHz,  $\text{CDCl}_3$ )  $\delta$ 2.64 (s, 3H), 7.16 (d,  $J = 16.3$  Hz, 1H), 7.24-7.28 (m, 1H), 7.33 (t,  $J = 7.3$  Hz, 1H), 7.41 (t,  $J = 7.5$  Hz, 2H), 7.63-7.56 (m, 4H), 7.98 (d,  $J = 8.4$  Hz, 2H).  $^{13}\text{C}$  NMR (100MHz,  $\text{CDCl}_3$ ):  $\delta$  26.60, 126.5, 126.82, 127.45, 128.33, 128.81, 128.89, 131.41, 135.96, 136.70, 142.0, 197.49.

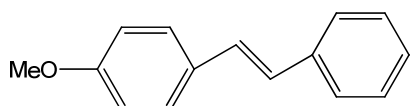

4-methoxy-*trans*-stilbene:  $^1\text{H}$  NMR (400MHz,  $\text{CDCl}_3$ ):  $\delta$  3.86 (s, 3H), 6.93 (d,  $J = 11.7$  Hz, 2H), 7.05 (m, 2H), 7.21-7.32(m, 1H), 7.37 (t,  $J = 7.6$  Hz, 2H), 7.50 (m, 4H);  $^{13}\text{C}$  NMR (100MHz,  $\text{CDCl}_3$ ):  $\delta$  55.33, 114.1, 126.25, 126.62, 127.25, 127.71, 128.21, 128.64, 130.19, 137.65, 159.30.

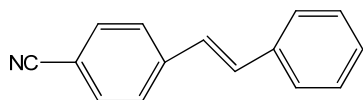

*trans*-stilbene-4-carbonitrile:  $^1\text{H}$  NMR (400MHz,  $\text{CDCl}_3$ ):  $\delta$ 7.12 (d,  $J = 16.3\text{Hz}$ , 1H), 7.20-7.30(m, 1H), 7.35 (t,  $J = 7.3$  Hz, 1H), 7.42 (t,  $J = 7.5$  Hz, 2H), 7.52-7.71 (m, 6H);  $^{13}\text{C}$  NMR (100MHz,  $\text{CDCl}_3$ ):  $\delta$ 110.59, 119.04, 126.73, 126.87, 126.92, 128.65, 128.86, 132.41, 132.50, 136.29, 141.84.

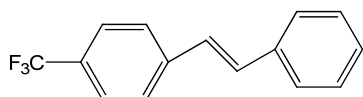

4-trifluoromethyl-*trans*-stilbene:  $^1\text{H}$  NMR (400MHz,  $\text{CDCl}_3$ ):  $\delta$ 7.15 (d,  $J = 16.3$  Hz, 1H), 7.23 (d,  $J = 16.4$  Hz, 1H), 7.33 (t,  $J = 7.3$  Hz, 1H), 7.41 (t,  $J = 7.5$  Hz, 2H), 7.56 (d,  $J = 7.5$  Hz, 2H) 7.63 (s, 4H);  $^{13}\text{C}$  NMR (100MHz,  $\text{CDCl}_3$ ):  $\delta$  125.62, 125.65, 126.57, 126.77, 127.13, 128.29, 128.8, 131.21, 136.63, 140.81.

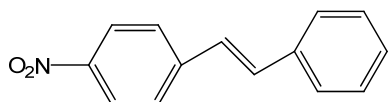

4-nitro-*trans*-stilbene:  $^1\text{H}$  NMR (400MHz,  $\text{CDCl}_3$ ):  $\delta$  7.17 (d,  $J = 16.3$  Hz, 1H), 7.30 (d,  $J = 16.3$  Hz, 1H), 7.36 (t,  $J = 7.3$  Hz, 1H), 7.43 (t,  $J = 7.4$  Hz, 2H), 7.58 (d,  $J = 7.2$  Hz, 2H), 7.66 (d,  $J = 8.8$  Hz, 2H), 8.25 (d,  $J = 8.8$  Hz, 2H);  $^{13}\text{C}$  NMR (100MHz,  $\text{CDCl}_3$ )  $\delta$  124.15, 126.30, 126.86, 127.02, 128.84, 128.90, 133.32, 136.19, 143.88, 146.80.

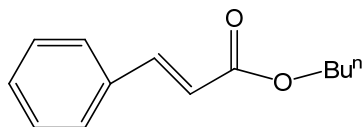

*trans*-cinnamic acid n-butyl ester:  $^1\text{H}$  NMR (400MHz,  $\text{CDCl}_3$ ):  $\delta$  0.99 (t,  $J = 7.4$  Hz, 3H), 1.38-1.58 (m, 2H), 1.64-1.83(m, 2H), 4.23 (t,  $J = 6.7$  Hz, 2H), 6.46 (d,  $J = 16.0$  Hz, 1H), 7.33-7.47 (m, 3H), 7.50-7.60 (m, 2H), 7.71 (d,  $J = 16.0$  Hz, 1H);  $^{13}\text{C}$  NMR (100MHz,  $\text{CDCl}_3$ ):  $\delta$  13.90, 19.38, 30.90, 64.55, 118.42, 128.04, 128.86, 130.18, 134.60, 144.52, 167.12.

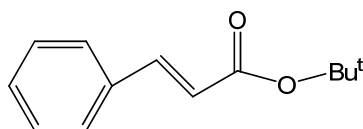

*trans*-cinnamic acid t-butyl ester:  $^1\text{H}$  NMR (400 MHz,  $\text{CDCl}_3$ )  $\delta$  1.57 (s, 9H), 6.40 (d,  $J = 16.0$  Hz, 1H), 7.37 (s, 3H), 7.52 (s, 2H), 7.62 (d,  $J = 16.0$  Hz, 1H).  $^{13}\text{C}$  NMR (100MHz,  $\text{CDCl}_3$ ):  $\delta$  28.22, 80.42, 120.22, 127.94, 128.81, 129.94, 134.68, 143.52, 166.26

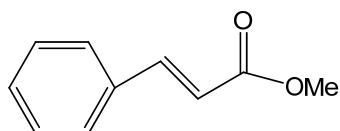

*trans*-cinnamic acid methyl ester:  $^1\text{H}$  NMR (400 MHz,  $\text{CDCl}_3$ )  $\delta$  3.80 (s, 3H), 6.44 (d,  $J = 16.0$  Hz, 1H), 7.32-7.46 (m, 3H), 7.44-7.62 (m, 2H), 7.69(d,  $J = 16.0$  Hz, 1H).  $^{13}\text{C}$  NMR (100MHz,  $\text{CDCl}_3$ ):  $\delta$  51.69, 117.84, 128.08, 128.90, 130.30, 134.42, 144.88, 167.42

## References

- (1) Kantam, M. L.; Srinivas, P.; Yadav, J.; Likhar, P. R.; Bhargava, S. *J. Org. Chem.* **2009**, *74*, 4882.
- (2) Cui, X.; Tao, C.-Z.; Xu Y.; Li, J.; Liu, L; Guo, Q.-X. *Org. Lett.* **2006**, *8*, 2467.
- (3) Nájera, C.; Gil-Moltó, J.; Karlstro1m, S.; Falvello, L. R. *Org. Lett.* **2003**, *5*, 1451.

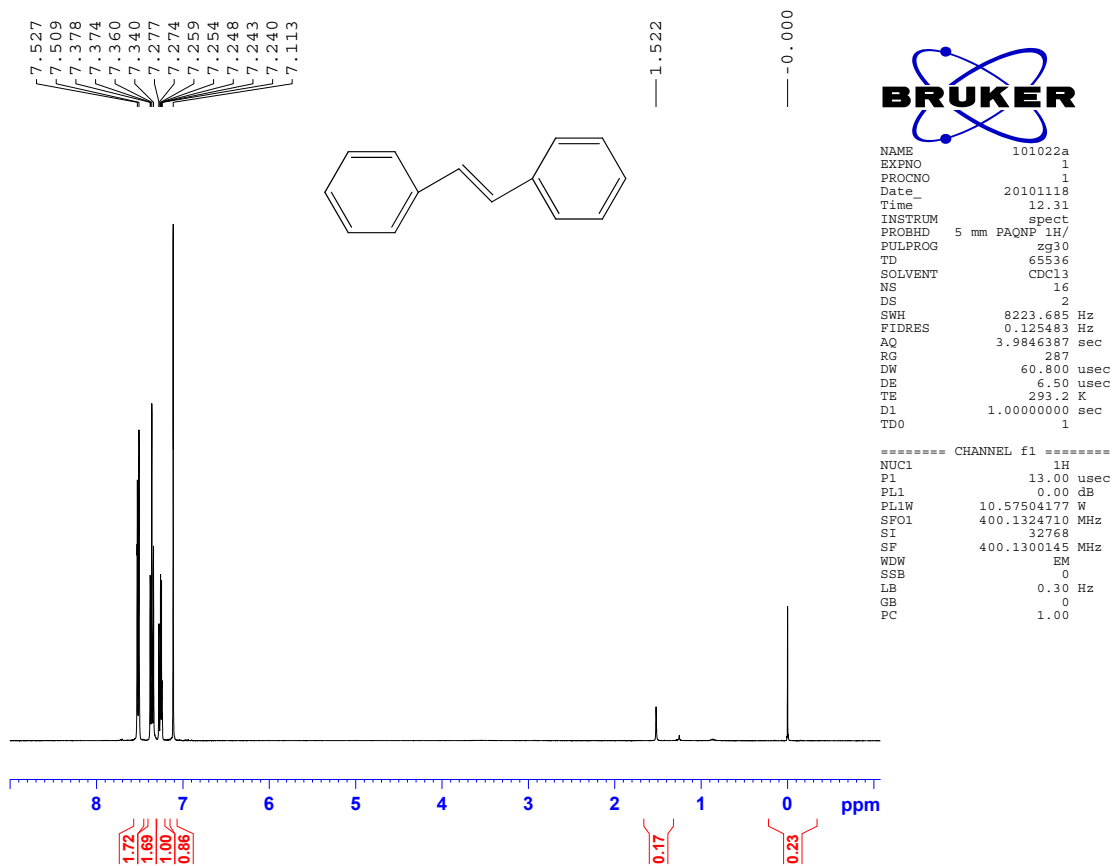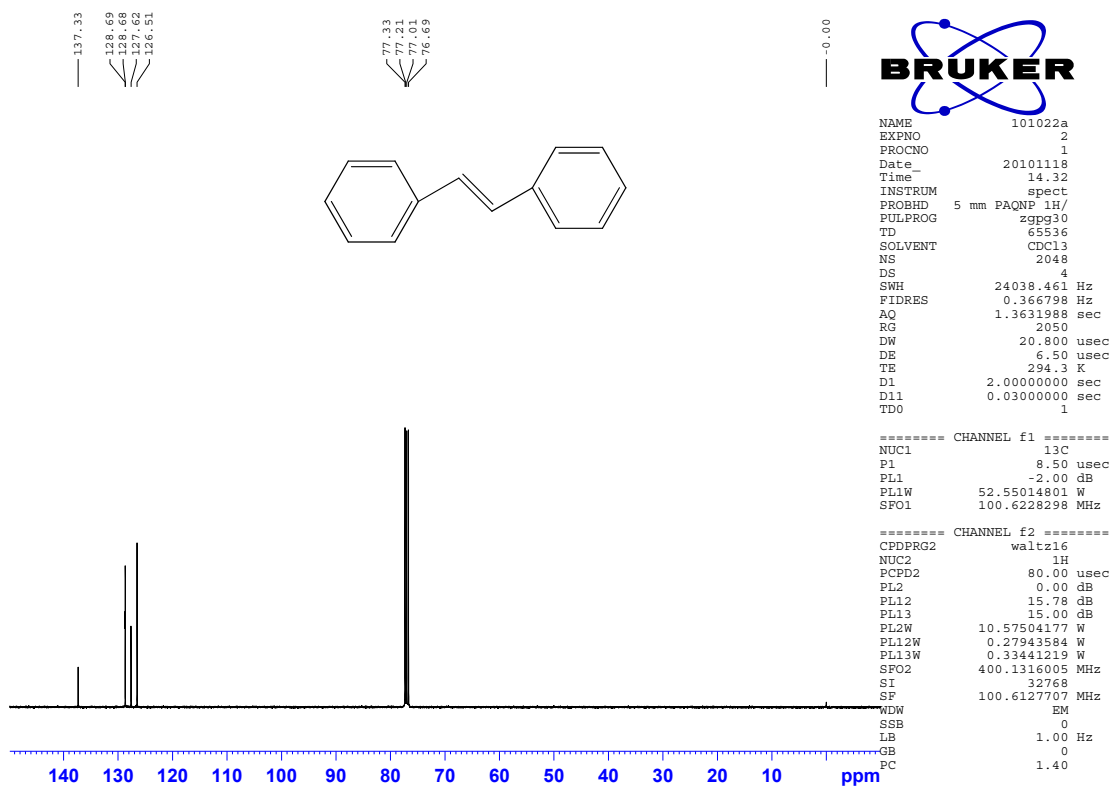

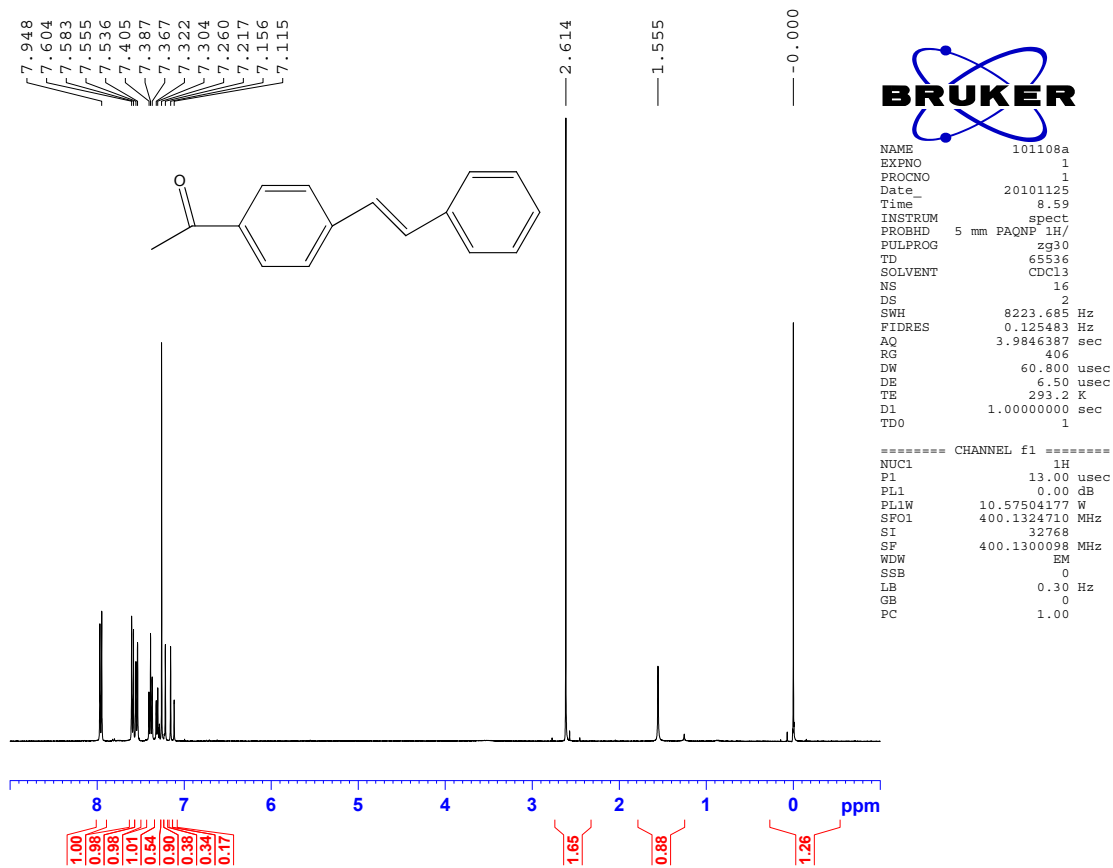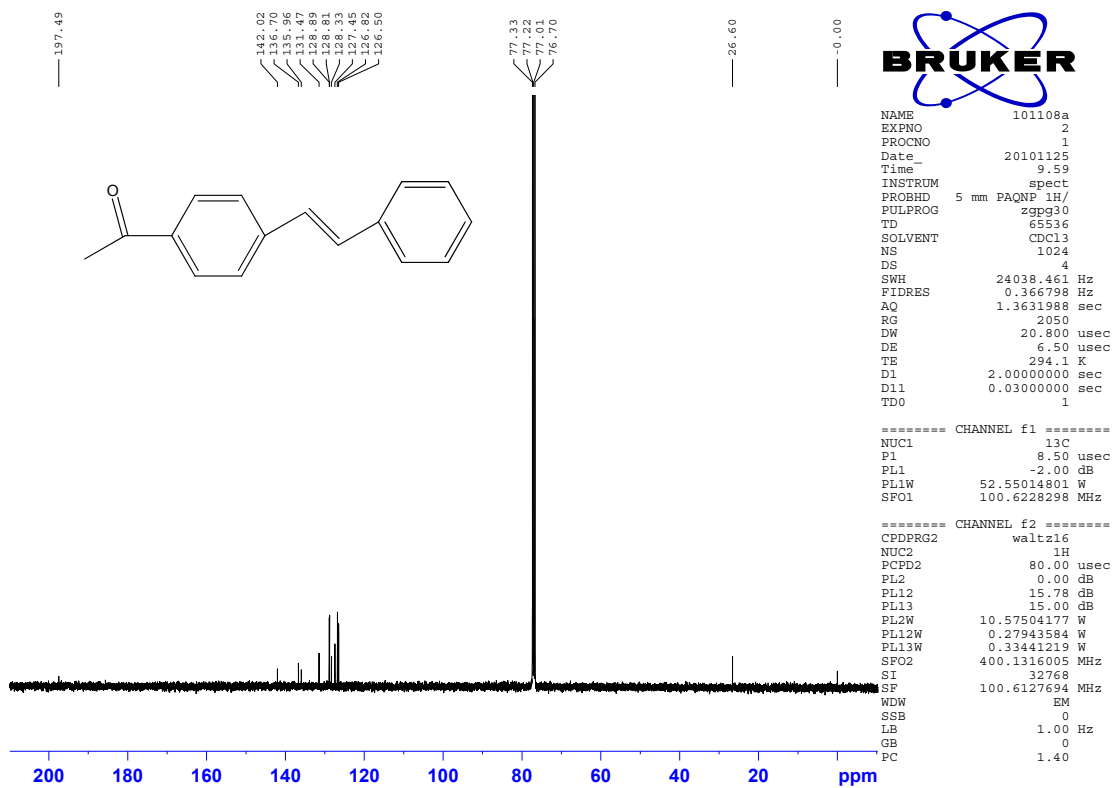

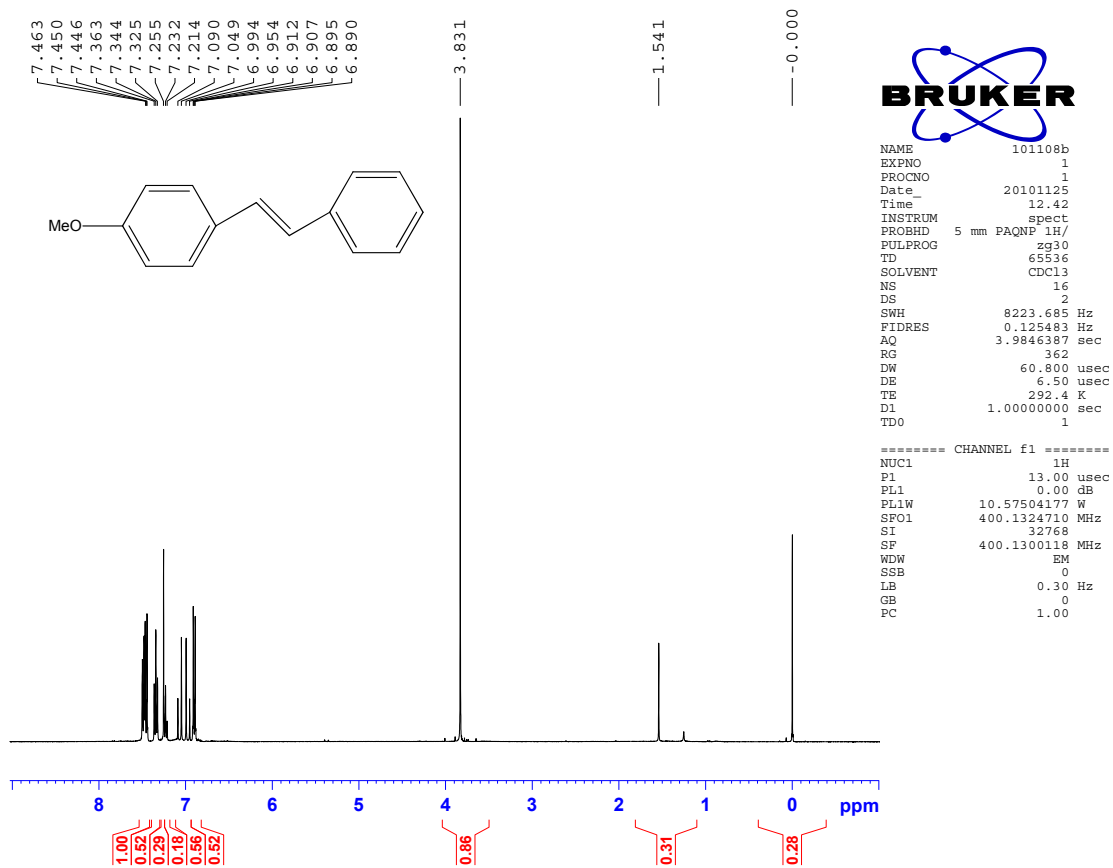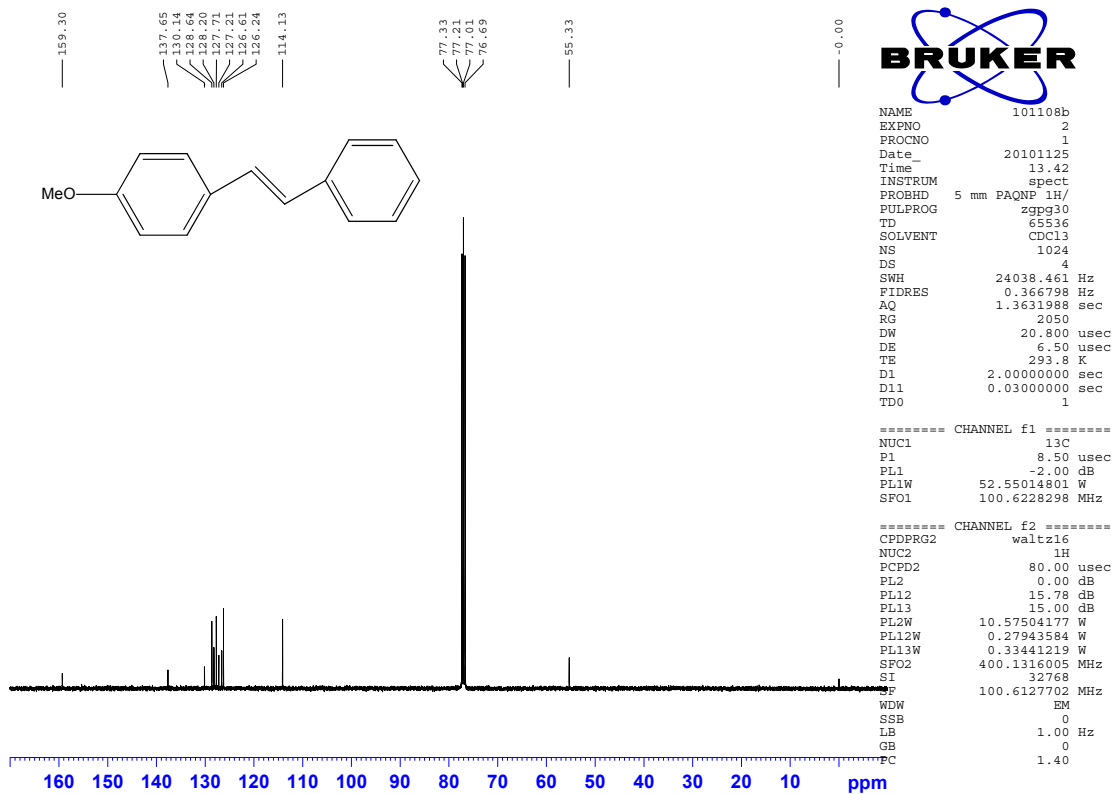

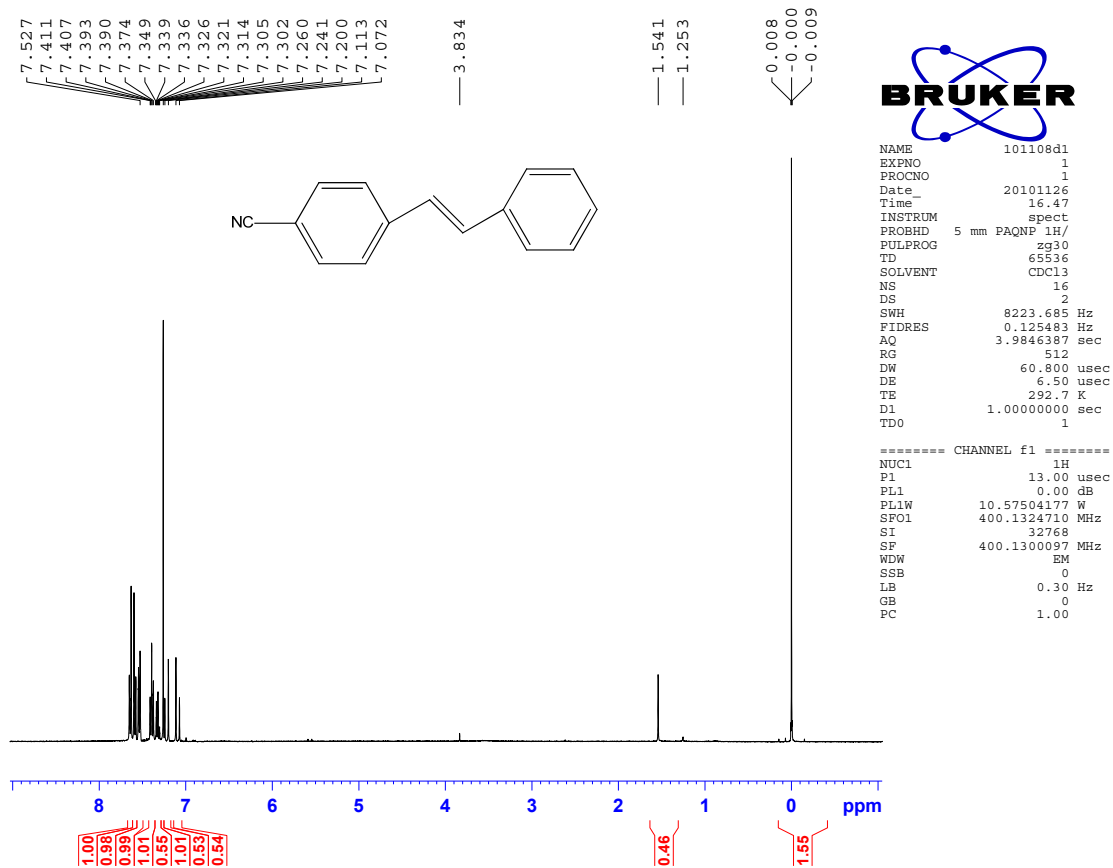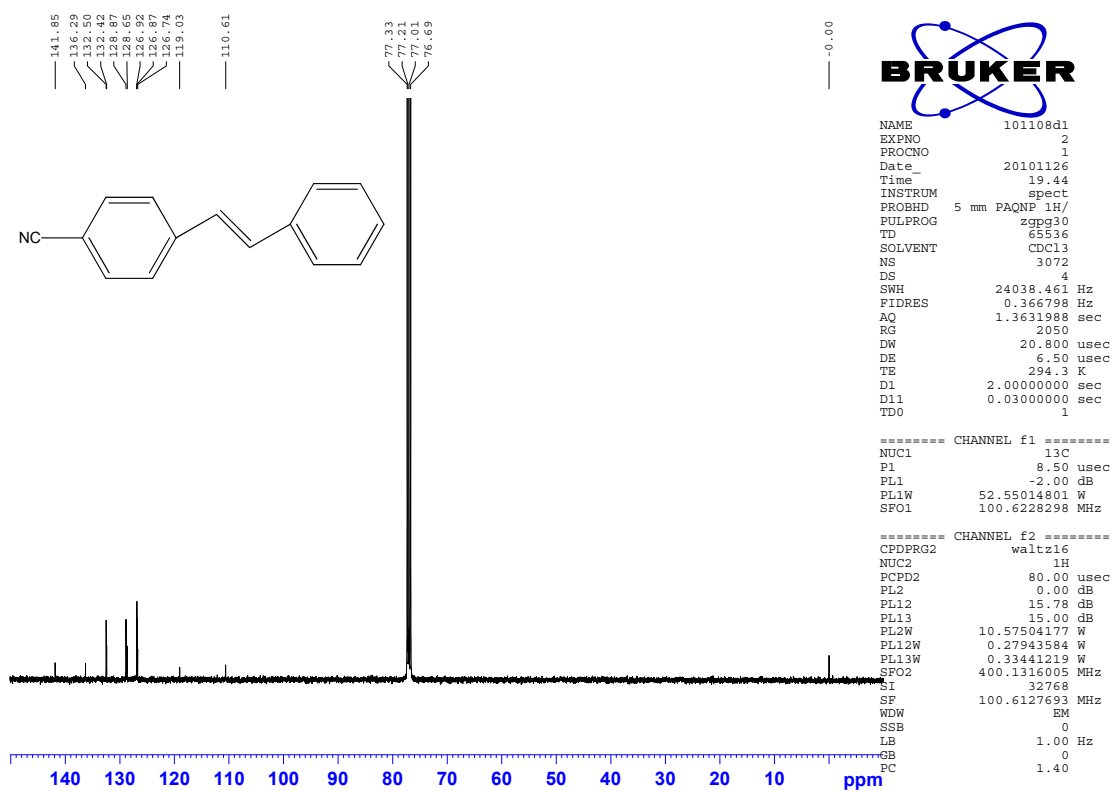

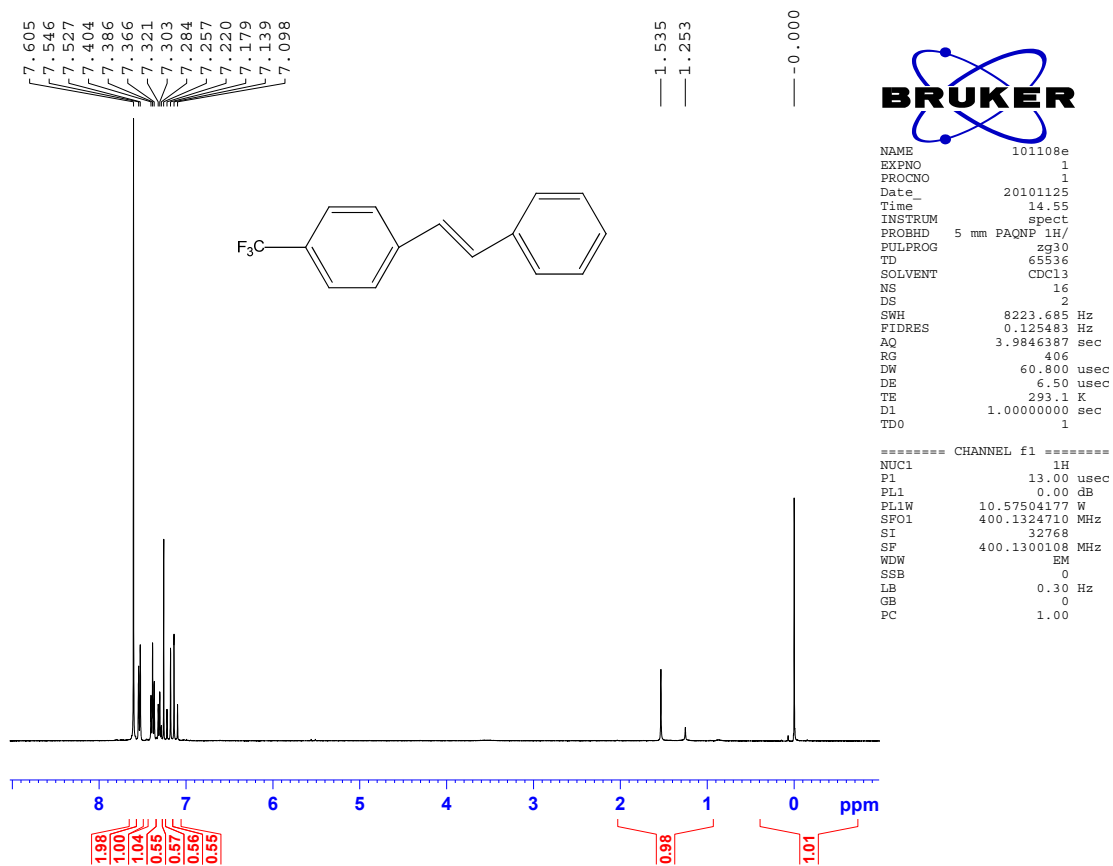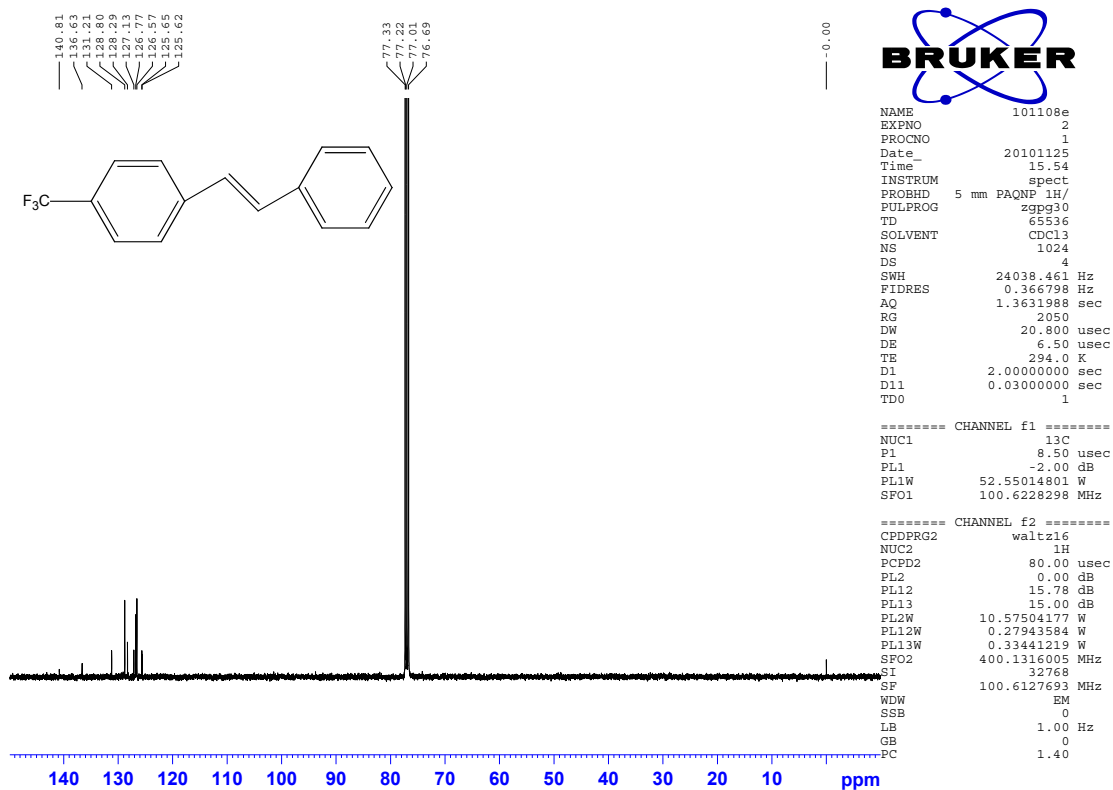



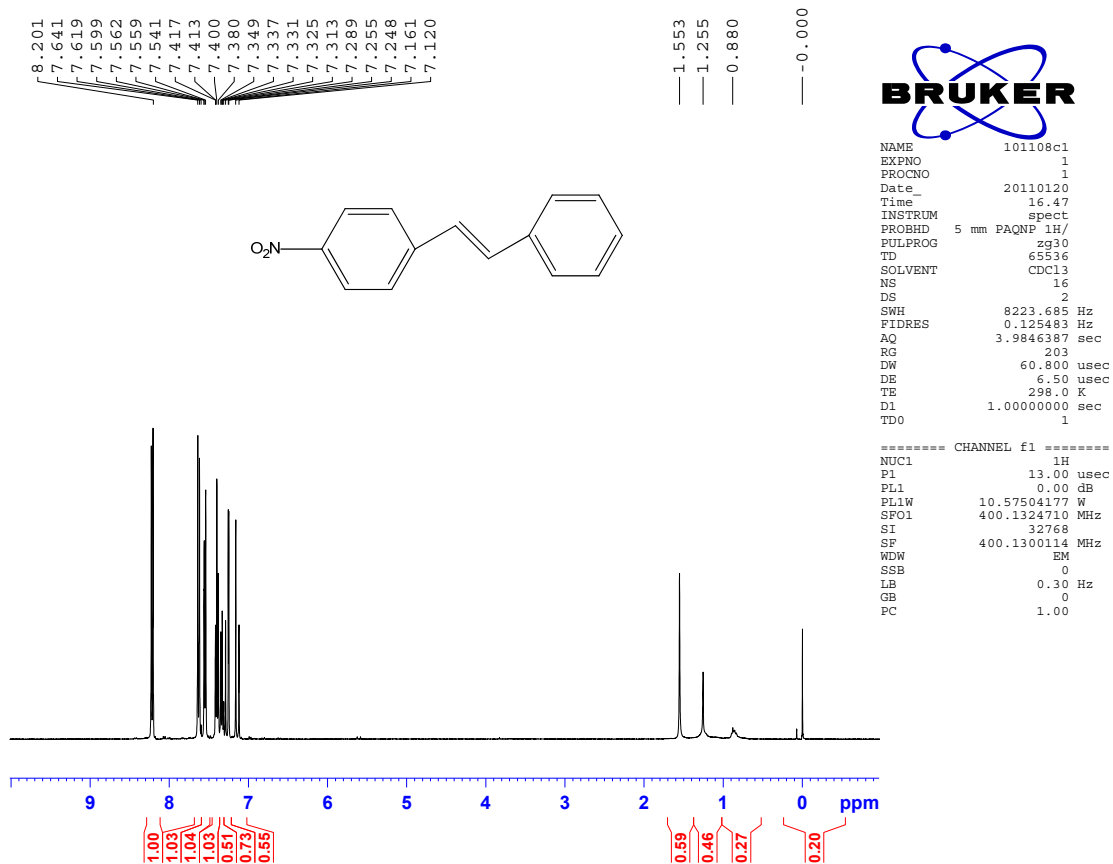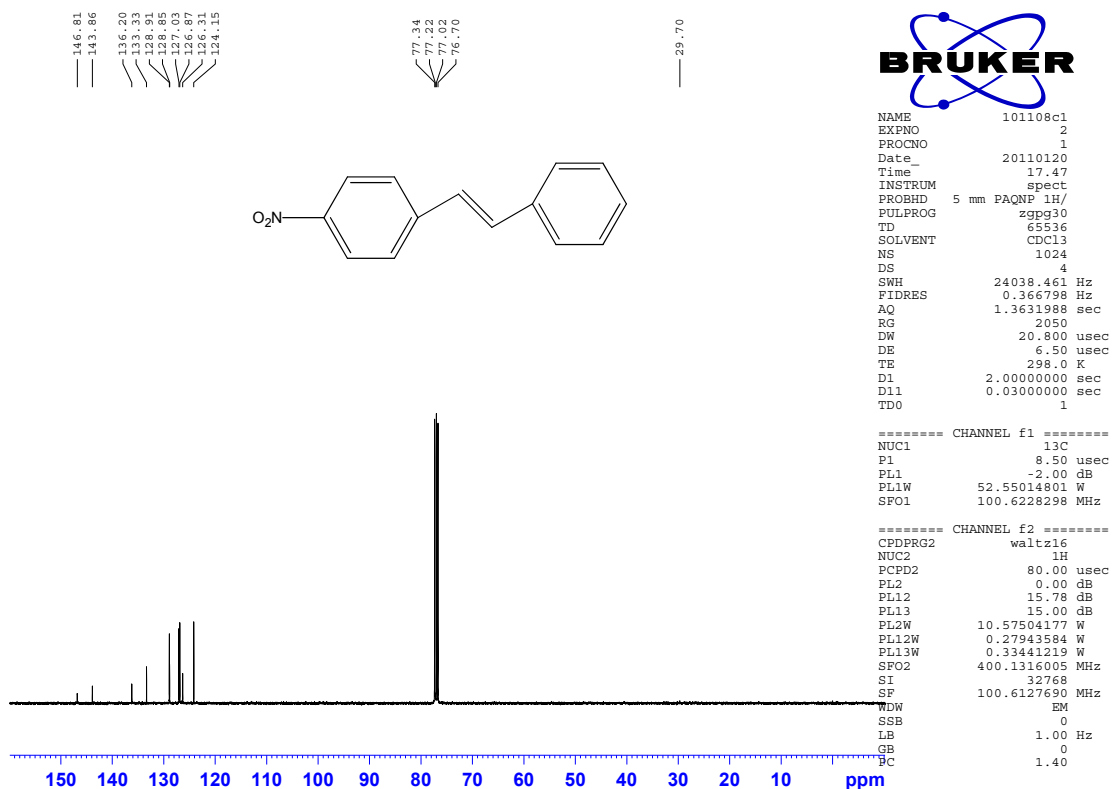

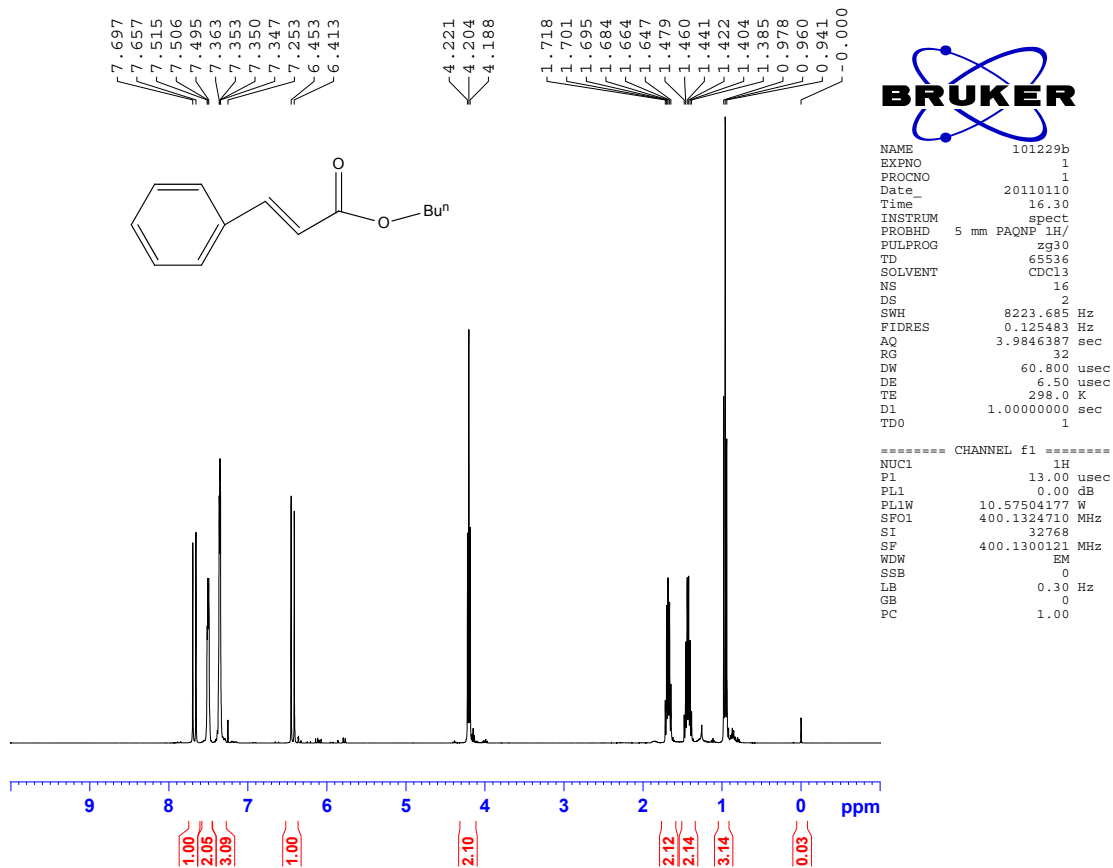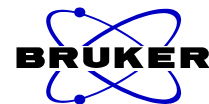

NAME 101229b  
 EXPNO 1  
 PROCNO 1  
 Date\_ 20110110  
 Time 16.30  
 INSTRUM spect  
 PROBHD 5 mm PAQNP 1H/  
 PULPROG zg30  
 TD 65536  
 SOLVENT CDCl3  
 NS 16  
 DS 2  
 SWH 8223.685 Hz  
 FIDRES 0.125483 Hz  
 AQ 3.9846387 sec  
 RG 32  
 DW 60.800 usec  
 DE 6.50 usec  
 TE 298.0 K  
 D1 1.0000000 sec  
 TD0 1

===== CHANNEL f1 =====  
 NUC1 1H  
 P1 13.00 usec  
 PL1 0.00 dB  
 PL1W 10.57504177 W  
 SFO1 400.1324710 MHz  
 SI 32768  
 SF 400.1300121 MHz  
 WDW EM  
 SSB 0  
 LB 0.30 Hz  
 GB 0  
 PC 1.00

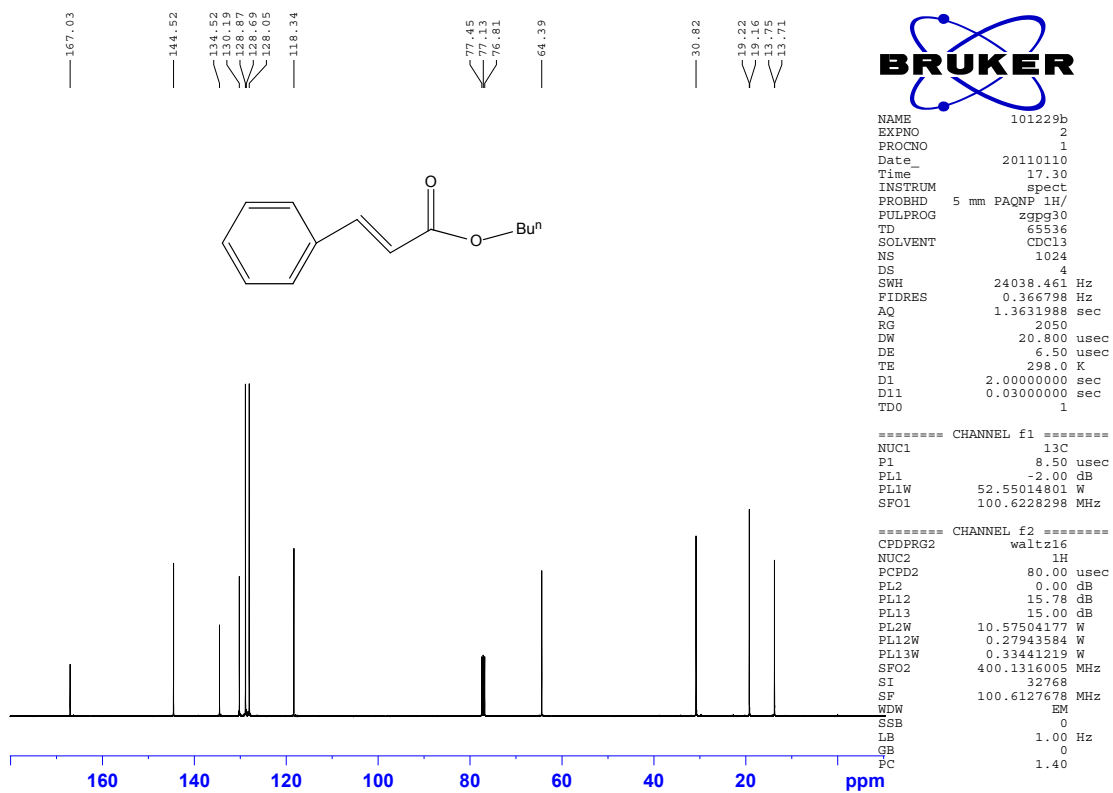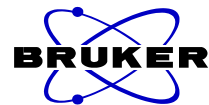

NAME 101229b  
 EXPNO 2  
 PROCNO 1  
 Date\_ 20110110  
 Time 17.30  
 INSTRUM spect  
 PROBHD 5 mm PAQNP 1H/  
 PULPROG zgpg30  
 TD 65536  
 SOLVENT CDCl3  
 NS 1024  
 DS 4  
 SWH 24038.461 Hz  
 FIDRES 0.366798 Hz  
 AQ 1.3631988 sec  
 RG 2050  
 DW 20.800 usec  
 DE 6.50 usec  
 TE 298.0 K  
 D1 2.0000000 sec  
 D11 0.0300000 sec  
 TD0 1

===== CHANNEL f1 =====  
 NUC1 13C  
 P1 8.50 usec  
 PL1 -2.00 dB  
 PL1W 52.55014801 W  
 SFO1 100.6228298 MHz

===== CHANNEL f2 =====  
 CPDPRG2 waltz16  
 NUC2 1H  
 PCPD2 80.00 usec  
 PL2 0.00 dB  
 PL12 15.78 dB  
 PL13 15.00 dB  
 PL2W 10.57504177 W  
 PL12W 0.27943584 W  
 PL13W 0.33441219 W  
 SFO2 400.1316005 MHz  
 SI 32768  
 SF 100.6127678 MHz  
 WDW EM  
 SSB 0  
 LB 1.00 Hz  
 GB 0  
 PC 1.40

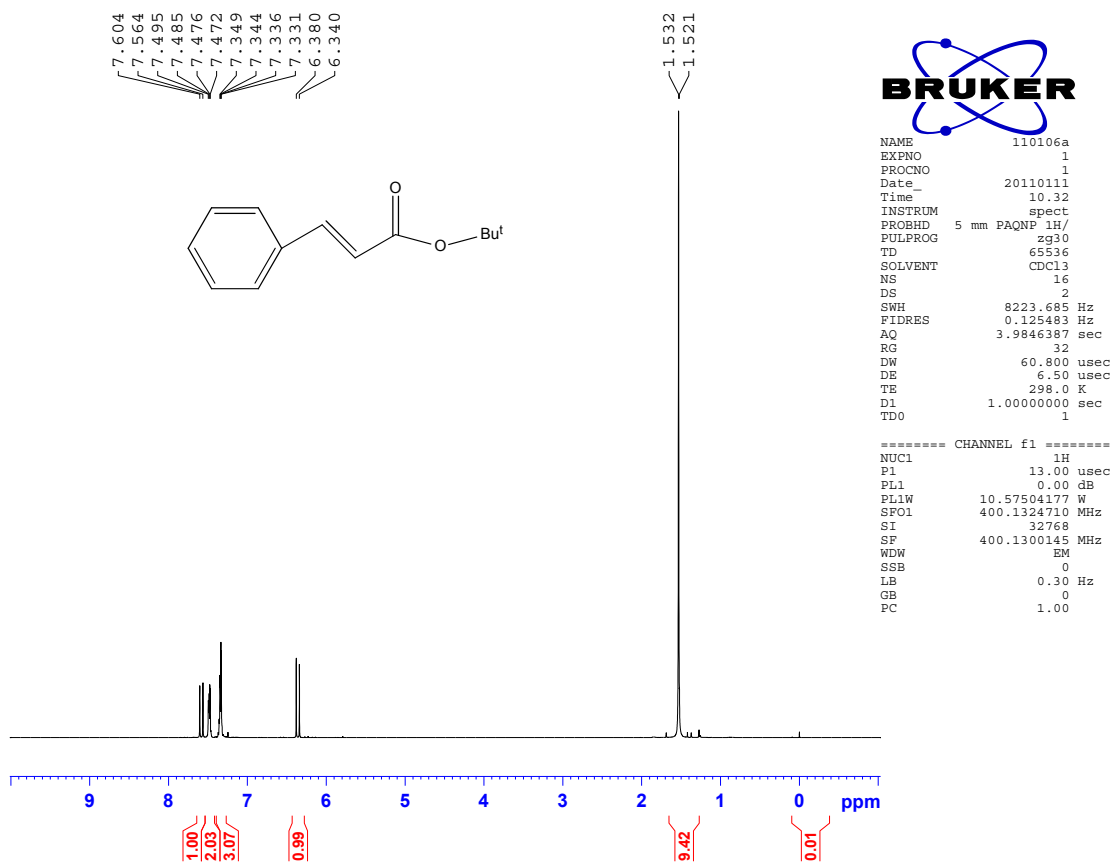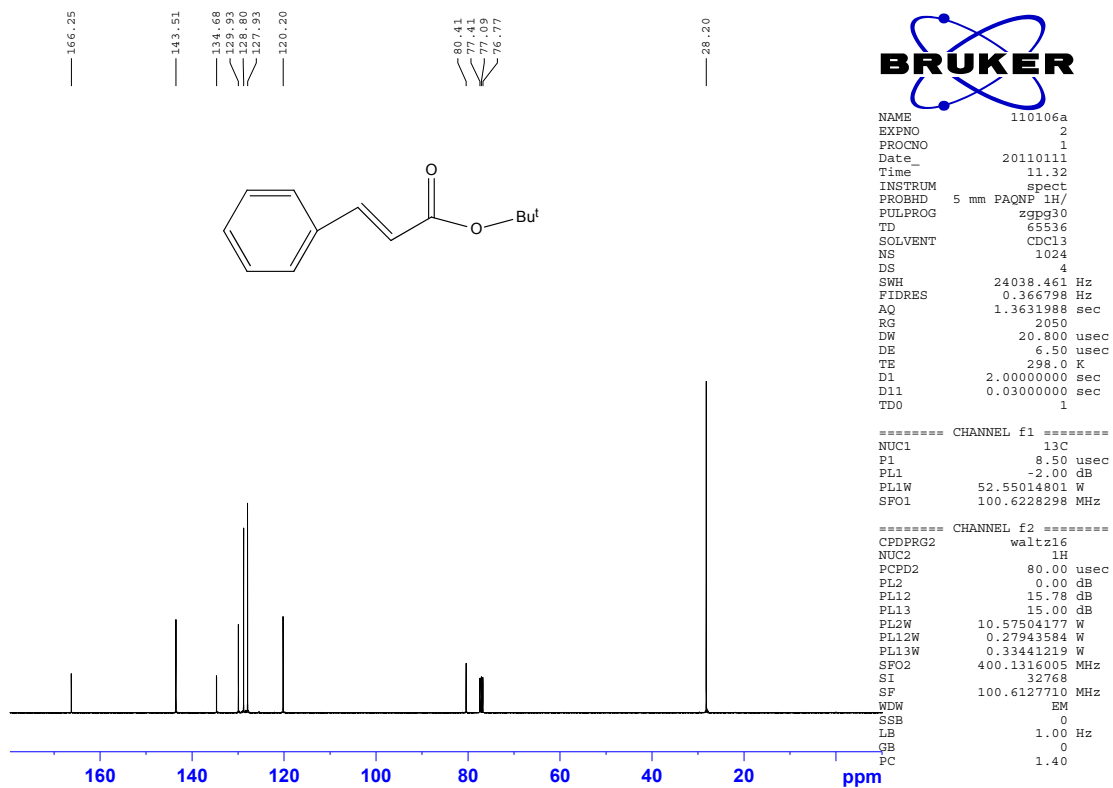

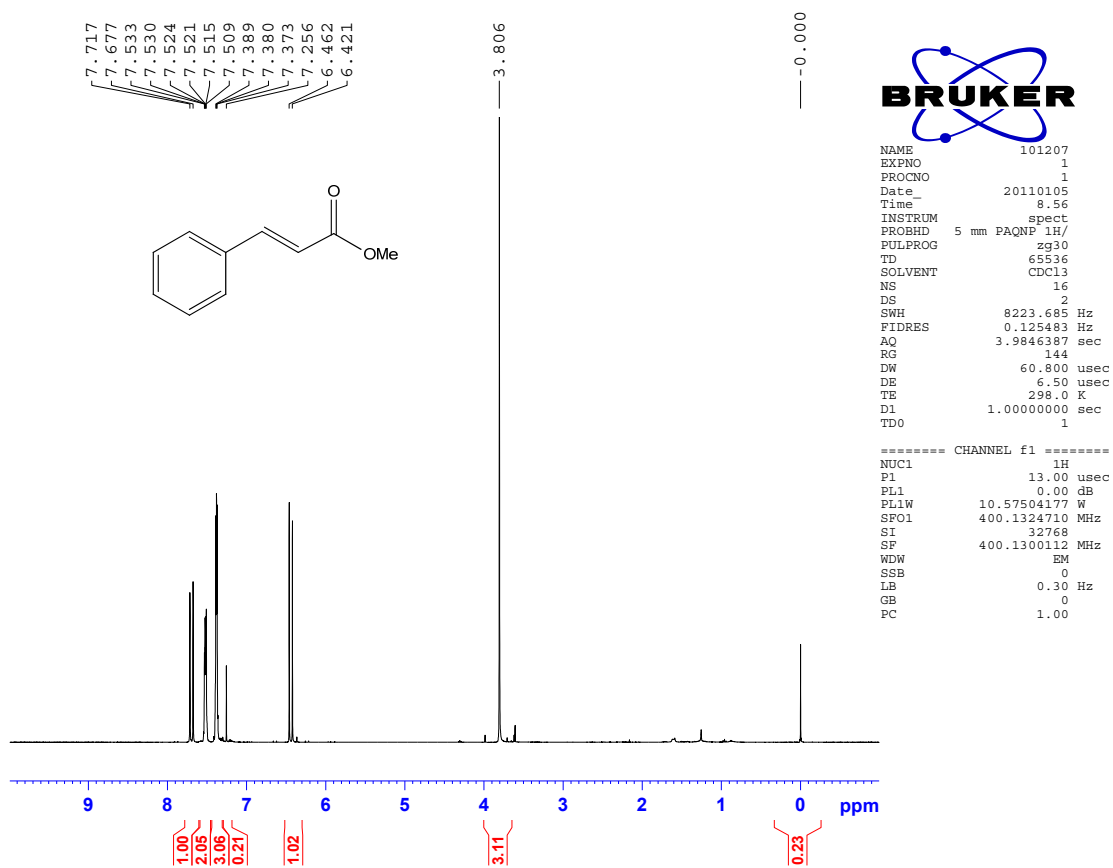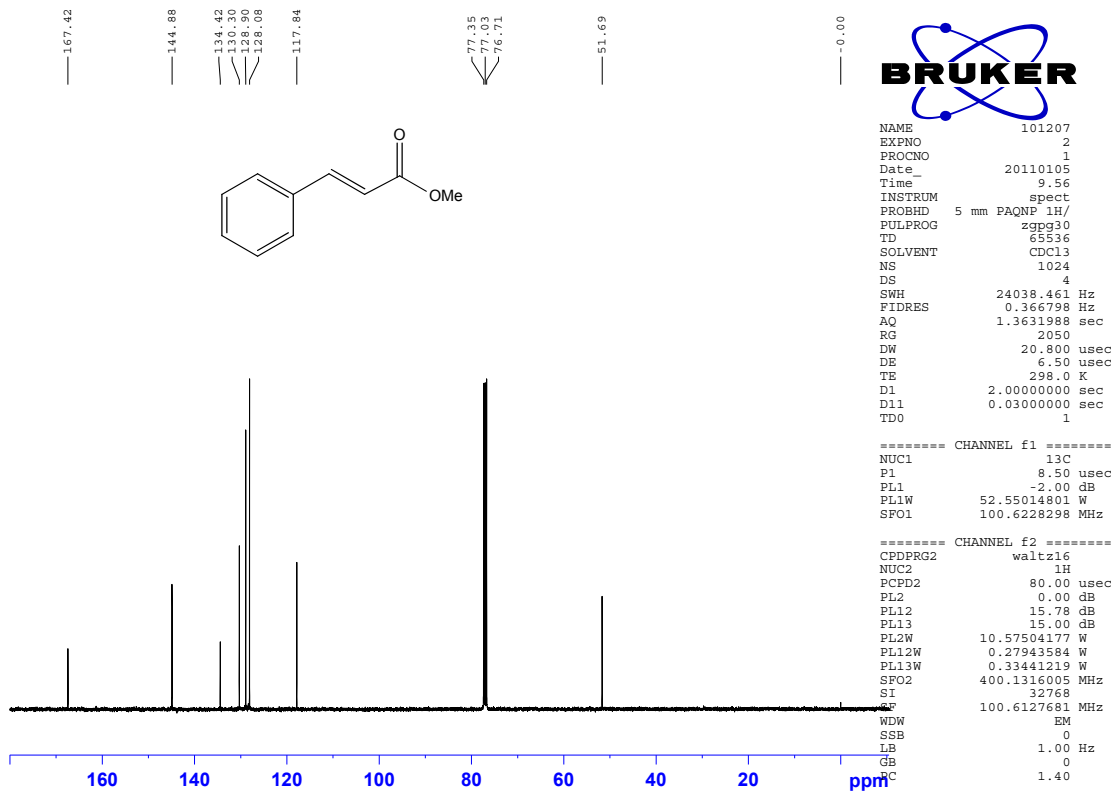

Supplement: c1jm11759a.pdf [file c1jm11759a.pdf]
